# Supplementary material
Source: MDPI journal article supplement (https://www.mdpi.com/1996-1073/9/8/584)
Supplement: s1 [file s1]

# Supplementary Materials: Environmental and Economic Performance of a Li-Ion Battery Pack. A Multiregional Input-Output Approach

Javier Sanf  lix, Cristina de la R  a, Jannick Hoejrup Schmidt, Maarten Messagie and Joeri Van Mierlo

## Introduction to Input-Output Analysis

Input-output analysis estimates the direct and indirect effects on the economy associated to a change in the final demand of goods and services, and it permits to know the distribution by activity sector of an industry's output through the economy. The operations included in an input-output analysis contain, in an aggregated way, the total production account of the economy of a certain region, and normally, also the imported accounts.

Input-output tables are derived from the supply and use tables. These tables are matrices describing the values of transactions in products and services for the national or regional economy categorized by product type and industry. A supply table shows which industries supply the different goods and services distinguishing between domestic and imports supply. Table S1 shows a simplified version of a supply table.

**Table S1.** Schematic outline of a supply table.

| Supplies |   | Producing Industries              |                                   | Rest of the World          | Total                     |
|----------|---|-----------------------------------|-----------------------------------|----------------------------|---------------------------|
|          |   | 1                                 | 2                                 |                            |                           |
| Products | 1 | Output of product 1 by industry 1 | Output of product 1 by industry 2 | Import values of product 1 | Total supply of product 1 |
| Total    |   | Total output of industry 1        | Total output of industry 2        | Total imports              | Total supply              |

As it can be noticed in Table S1, the different industries are shown in columns, while the products are described in the rows. Thus, from the rows it is possible to see which industries produce product 1, and in the columns it is possible to see all the products produce by the different industries.

A use table is centered in the consumption matrix, which allows observing the amount consumed at a basic price by producing industry and product. It shows the use of goods and services categorized by product and by type of use. In other words, it indicates how much is allocated to intermediate consumption, final consumption, capital creation and exports. Table S2 shows a simplified use table.

**Table S2.** Schematic outline of a use table.

| Uses                      | Industries | Final Consumption                                                                                                   | Gross Capital Formation | Rest of the World       | Total                 |
|---------------------------|------------|---------------------------------------------------------------------------------------------------------------------|-------------------------|-------------------------|-----------------------|
|                           | 1          |                                                                                                                     |                         |                         |                       |
| Products                  | 1          | Intermediate consumption by product and industry                                                                    |                         | Exports                 | Total use by products |
| Total                     |            | Total intermediate consumption by industry                                                                          | Final consumption       | Gross capital formation | Total exports         |
| Components of value added |            | Compensation of employees;<br>Other taxes less subsidies;<br>Net operating surplus;<br>Consumption of fixed capital |                         |                         |                       |

The supply and use tables are the base to create the symmetric input-output table that allows observing production relations of the economic sectors or activities. Supply and use tables are not symmetric, since there are industries that provide more than one good and/or service and there are goods and/or services that are produced by different industries.

The symmetric table is conformed as a matrix in which the producing industries are in the rows and columns, with the fluxes in basic prices. In order to create the symmetric table the following transformations have to be applied to the use table [1]:

1. convert the table in basic prices,
2. convert the producing industries in homogeneous industries,
3. aggregate the products in the rows to create the homogeneous industries identic to the ones listed in the columns.

In order to apply the mentioned steps, one of the following hypothesis has to be taken:

1. product technology: it is assumed that every product is produced with the same technology independently of the industry in which it is produced, thus, it requires the same consumables for its production.
2. industry technology: it is assumed that each industry of the table produces its different products with the same technology.

Table S3 shows a simplified input-output table. The matrix shows how supply matches uses via an industry-by-industry categorization of output and the detailed transactions of intermediate consumption and final uses.

**Table S3.** Schematic outline of a symmetric input-output table.

|                           |   | Homogenized Industry     | Final Consumption                                                   | Gross Capital Formation | Rest of the World | Total     |
|---------------------------|---|--------------------------|---------------------------------------------------------------------|-------------------------|-------------------|-----------|
|                           | 1 |                          |                                                                     |                         |                   |           |
| Homogenized industry      | 1 | Intermediate consumption | Final consumption of households, NPISHs <sup>1</sup> and government | Gross capital formation | Exports           | Total use |
| Totals                    |   | Total supply             |                                                                     |                         | Total exports     | Total use |
| Components of value added |   |                          |                                                                     |                         |                   |           |
| Rest of the world         |   | Imports                  |                                                                     |                         |                   |           |
| Total                     |   |                          |                                                                     |                         |                   |           |

<sup>1</sup> NPISH—Non-Profit Institutions Serving Households.

An input-output table can have two alternative readings: columns show how products are used as intermediate consumption to make products, this is the production costs, and rows show how the outputs of industry are used in the intermediate consumption of other industries to create the industrial output, this is the distribution of the production among the sectors. Now that the origin of the input-output table has been expounded, hereunder the mathematical structure of an input-output model is described. Table S4 shows again the structure of an input-output table.

**Table S4.** Structure of an input-output table.

|                                  | Input to Sectors ( <i>j</i> ) |                 |                 |                 | Final Demand<br>Y | Total Output<br>X |
|----------------------------------|-------------------------------|-----------------|-----------------|-----------------|-------------------|-------------------|
| Output from sectors ( <i>i</i> ) | 1                             | 2               | 3               | n               |                   |                   |
| 1                                | X <sub>11</sub>               | X <sub>12</sub> | X <sub>13</sub> | X <sub>1n</sub> | y <sub>1</sub>    | X <sub>1</sub>    |
| 2                                | X <sub>21</sub>               | X <sub>22</sub> | X <sub>23</sub> | X <sub>2n</sub> | y <sub>2</sub>    | X <sub>2</sub>    |
| 3                                | X <sub>31</sub>               | X <sub>32</sub> | X <sub>33</sub> | X <sub>3n</sub> | y <sub>3</sub>    | X <sub>3</sub>    |
| n                                | X <sub>n1</sub>               | X <sub>n2</sub> | X <sub>n3</sub> | X <sub>nn</sub> | y <sub>n</sub>    | X <sub>n</sub>    |
| Intermediate input I             | I <sub>1</sub>                | I <sub>2</sub>  | I <sub>3</sub>  | I <sub>n</sub>  |                   |                   |
| Value added V                    | V <sub>1</sub>                | V <sub>2</sub>  | V <sub>3</sub>  | V <sub>n</sub>  | GDP               |                   |
| Total input X                    | X <sub>1</sub>                | X <sub>2</sub>  | X <sub>3</sub>  | X <sub>n</sub>  |                   |                   |

where:

X<sub>ij</sub> are the inputs to industrial sector *j* from sector *i*

y<sub>i</sub> is the final demand of each sector *i*

X<sub>i</sub> is the total output for each sector *i*

V<sub>j</sub> is the difference between total output X<sub>j</sub> and intermediate input I<sub>j</sub>

Thus, the total production by sector 1 is given by Equation (S1).

$$X_1 = x_{11} + x_{12} + x_{13} + \dots + x_{1n} + y_1 \quad (\text{S1})$$

For calculation purposes another matrix has to be calculated. Known as the matrix of technical coefficients, it represents the inputs that one sector requires from other sectors to produce one monetary unit of output. The technical coefficients,  $a_{ij}$ , are calculated using Equation (S2).

$$a_{ij} = \frac{x_{ij}}{X_j} \quad (\text{S2})$$

Therefore,  $a_{ij}$  is the need that sector  $j$  has of the products from sector  $i$  to produce one unit of the product  $j$ . Equation (S3) can also be expressed as:

$$x_{ij} = a_{ij} \cdot X_j \quad (\text{S3})$$

If Equation (S3) is substituted in Equation (S1), the total production of a sector is defined as:

$$X_1 = a_{11} \cdot X_1 + a_{12} \cdot X_2 + a_{13} \cdot X_3 + \dots + a_{1n} \cdot X_n + y_1 \quad (\text{S4})$$

If Equation (S4) is expanded to the different industry sectors:

$$\begin{aligned} X_1 &= a_{11} \cdot X_1 + a_{12} \cdot X_2 + \dots + a_{1n} \cdot X_n + y_1 \\ X_2 &= a_{21} \cdot X_1 + a_{22} \cdot X_2 + \dots + a_{2n} \cdot X_n + y_2 \\ X_n &= a_{n1} \cdot X_1 + a_{n2} \cdot X_2 + \dots + a_{nn} \cdot X_n + y_n \end{aligned}$$

Defining the matrix of technical coefficients  $A$  which contains all the terms  $a_{ij}$ :

$$\begin{pmatrix} X_1 \\ X_2 \\ \vdots \\ X_n \end{pmatrix} = \begin{pmatrix} a_{11} & a_{12} & \dots & a_{1n} \\ a_{21} & a_{22} & \dots & a_{2n} \\ \vdots & \vdots & \ddots & \vdots \\ a_{n1} & a_{n2} & \dots & a_{nn} \end{pmatrix} \cdot \begin{pmatrix} X_1 \\ X_2 \\ \vdots \\ X_n \end{pmatrix} + \begin{pmatrix} y_1 \\ y_2 \\ \vdots \\ y_n \end{pmatrix} \rightarrow X = A \cdot X + Y \quad (\text{S5})$$

By definition  $A$  is a non-negative matrix with  $a_{ij} \geq 0$  for all  $i$  and  $j$  ( $A \geq 0$ ), and each of the column sums is less than one ( $\sum_{i=1}^n a_{ij} < 1$  for all  $j$ ) [2].

If we bring all  $X$  terms to the left,

$$\begin{aligned} X_1 - a_{11} \cdot X_1 - a_{12} \cdot X_2 - \dots - a_{1n} \cdot X_n &= y_1 \\ X_2 - a_{21} \cdot X_1 - a_{22} \cdot X_2 - \dots - a_{2n} \cdot X_n &= y_2 \\ X_n - a_{n1} \cdot X_1 - a_{n2} \cdot X_2 - \dots - a_{nn} \cdot X_n &= y_n \end{aligned}$$

and grouping the  $X_1$  together in the first equation, the  $X_2$  in the second equation, and so on, the final demand can be expressed for the different sectors:

$$\begin{aligned} (1 - a_{11}) \cdot X_1 - a_{12} \cdot X_2 - \dots - a_{1n} \cdot X_n &= y_1 \\ -a_{21} \cdot X_1 + (1 - a_{22}) \cdot X_2 - \dots - a_{2n} \cdot X_n &= y_2 \\ -a_{n1} \cdot X_1 - a_{n2} \cdot X_2 - \dots + (1 - a_{nn}) \cdot X_n &= y_n \end{aligned} \quad (\text{S6})$$

Being  $I$  the identity matrix  $n \times n$  and considering the technical coefficient matrix  $A$ :

$$I = \begin{pmatrix} 1 & \dots & 0 \\ \vdots & \ddots & \vdots \\ 0 & \dots & 1 \end{pmatrix} \quad \text{so then } (I - A) = \begin{pmatrix} (1 - a_{11}) & -a_{12} & \dots & -a_{1n} \\ -a_{21} & (1 - a_{22}) & \dots & -a_{2n} \\ \vdots & \vdots & \ddots & \vdots \\ -a_{n1} & -a_{n2} & \dots & (1 - a_{nn}) \end{pmatrix}$$

Then

$$\begin{aligned} (I - A) \cdot X &= Y \\ \text{thus } X &= (I - A)^{-1} \cdot Y \end{aligned} \quad (\text{S7})$$

which represents the required economic purchases, direct and indirect, of a country or region to cover a final demand. The term  $(I - A)^{-1}$  is the Leontief inverse matrix which represents all the direct and

indirect requirements in the supply chain. For input-output coefficient matrix ( $A$ ) with the two characteristics mentioned above ( $a_{ij} \geq 0$  and  $\sum_{i=1}^n a_{ij} < 1$  for all  $j$ ) Equation (S7) can also be expressed by:

$$X = (I - A)^{-1} \cdot Y = (I + A + A^2 + A^3 + \dots) \cdot Y \quad (\text{S8})$$

The different terms of Equation (S8) represents the production of the desired output or final demand ( $I \cdot Y$ ), the contributions from the first suppliers level ( $A \cdot Y$ ), the second indirect suppliers level ( $A^2 \cdot Y$ ), etc. [3]. The term  $(I - A)^{-1}$  is the Leontief inverse matrix that describes the direct and indirect requirements of the supply chain required to satisfy one unit of final demand  $Y$ .

**Table S5.** List of economic activity sectors included in the WIOD and its code.

| Code  | Economic Activity Sector                                                            |
|-------|-------------------------------------------------------------------------------------|
| AtB   | Agriculture, Hunting, Forestry and Fishing                                          |
| C     | Mining and Quarrying                                                                |
| 15t16 | Food, Beverages and Tobacco                                                         |
| 17t18 | Textiles and Textile Products                                                       |
| 19    | Leather, Leather and Footwear                                                       |
| 20    | Wood and Products of Wood and Cork                                                  |
| 21t22 | Pulp, Paper, Paper, Printing and Publishing                                         |
| 23    | Coke, Refined Petroleum and Nuclear Fuel                                            |
| 24    | Chemicals and Chemical Products                                                     |
| 25    | Rubber and Plastics                                                                 |
| 26    | Other Non-Metallic Mineral                                                          |
| 27t28 | Basic Metals and Fabricated Metal                                                   |
| 29    | Machinery, Nec                                                                      |
| 30t33 | Electrical and Optical Equipment                                                    |
| 34t35 | Transport Equipment                                                                 |
| 36t37 | Manufacturing, Nec; Recycling                                                       |
| E     | Electricity, Gas and Water Supply                                                   |
| F     | Construction                                                                        |
| 50    | Sale, Maintenance and Repair of Motor Vehicles and Motorcycles; Retail Sale of Fuel |
| 51    | Wholesale Trade and Commission Trade, Except of Motor Vehicles and Motorcycles      |
| 52    | Retail Trade, Except of Motor Vehicles and Motorcycles; Repair of Household Goods   |
| H     | Hotels and Restaurants                                                              |
| 60    | Inland Transport                                                                    |
| 61    | Water Transport                                                                     |
| 62    | Air Transport                                                                       |
| 63    | Other Supporting and Auxiliary Transport Activities; Activities of Travel Agencies  |
| 64    | Post and Telecommunications                                                         |
| J     | Financial Intermediation                                                            |
| 70    | Real Estate Activities                                                              |
| 71t74 | Renting of M&Eq and Other Business Activities                                       |
| L     | Public Admin and Defence; Compulsory Social Security                                |
| M     | Education                                                                           |
| N     | Health and Social Work                                                              |
| O     | Other Community, Social and Personal Services                                       |
| P     | Private Households with Employed Persons                                            |

**Table S6.** Assignment of inventory components to industrial sectors in the manufacturing of cells.

| Component      |                     | Activity sector |                                   |         |
|----------------|---------------------|-----------------|-----------------------------------|---------|
|                | Name                | Code            | Name                              | Country |
| Anode          | Graphite            | C               | Mining and Quarrying              | FN      |
|                | Conductive additive | C               | Mining and Quarrying              | FN      |
|                | Binder              | 25              | Rubber and Plastics               | FN      |
|                | Solvent             | 24              | Chemicals and Chemical Products   | FN      |
|                | Negative substrate  | 27128           | Basic Metals and Fabricated Metal | FN      |
| Cathode        | LiFePO4             | 24              | Chemicals and Chemical Products   | FN      |
|                | Conductive additive | C               | Mining and Quarrying              | FN      |
|                | Binder              | 25              | Rubber and Plastics               | FN      |
|                | Solvent             | 24              | Chemicals and Chemical Products   | FN      |
|                | Positive substrate  | 27128           | Basic Metals and Fabricated Metal | FN      |
|                | Separator           | 25              | Rubber and Plastics               | FN      |
| Elect.         | LPF6                | 24              | Chemicals and Chemical Products   | FN      |
|                | Solvent             | 24              | Chemicals and Chemical Products   | FN      |
| Cell container | Aluminium tab       | 27128           | Basic Metals and Fabricated Metal | FN      |
|                | Copper tab          | 27129           | Basic Metals and Fabricated Metal | FN      |
|                | Aluminium           | 27128           | Basic Metals and Fabricated Metal | FN      |
|                | PETP                | 25              | Rubber and Plastics               | FN      |
|                | Oriented nylon      | 25              | Rubber and Plastics               | FN      |
|                | Polypropylene       | 25              | Rubber and Plastics               | FN      |
|                | Packaging film      | 25              | Rubber and Plastics               | FN      |
|                | Electricity         | E               | Electricity, Gas and Water Supply | FN      |
|                | Transport by rail   | 60              | Inland Transport                  | FN      |
|                | Transport by road   | 60              | Inland Transport                  | FN      |

**Table S6.** Assignment inventory components to industrial sectors in the manufacturing of BCU.

| Component       |                   | Activity sector |                                   |         |
|-----------------|-------------------|-----------------|-----------------------------------|---------|
|                 | Name              | Code            | Name                              | Country |
| BMS             | Circuit board     | 30133           | Electrical and Optical Equipment  | FR      |
|                 | Copper            | 27128           | Basic Metals and Fabricated Metal | FR      |
|                 | Steel             | 27128           | Basic Metals and Fabricated Metal | FR      |
| DC/DC converter | Inverter board    | 30133           | Electrical and Optical Equipment  | FR      |
|                 | Capacitor         | 30133           | Electrical and Optical Equipment  | FR      |
|                 | Rectifier board   | 30133           | Electrical and Optical Equipment  | FR      |
|                 | Transformer       | 30133           | Electrical and Optical Equipment  | FR      |
|                 | Inductance (self) | 30133           | Electrical and Optical Equipment  | FR      |
|                 | Wires             | 30133           | Electrical and Optical Equipment  | FR      |
|                 | Aluminium plate   | 27128           | Basic Metals and Fabricated Metal | FR      |
|                 | Electricity       | E               | Electricity, Gas and Water Supply | FR      |
|                 | Transport by rail | 60              | Inland Transport                  | FR      |
|                 | Transport by road | 60              | Inland Transport                  | FR      |

**Table S7.** Assignment inventory components to industrial sectors in the manufacturing of the modules.

| Component   |                   | Activity sector |                                                          |         |
|-------------|-------------------|-----------------|----------------------------------------------------------|---------|
|             | Name              | Code            | Name                                                     | Country |
| Module case | Adhesive          | 20              | Manufacture of chemicals and chemical products           | BE      |
|             | Connection        | 26              | Manufacture of computer, electronic and optical products | BE      |
|             | Cooling plate     | 24              | Manufacture of basic metals                              | BE      |
|             | Cover frame       | 22              | Manufacture of rubber and plastic products               | BE      |
|             | Foam (EPDM)       | 22              | Manufacture of rubber and plastic products               | BE      |
|             | Foam (PUR)        | 22              | Manufacture of rubber and plastic products               | BE      |
|             | Frame             | 22              | Manufacture of rubber and plastic products               | BE      |
|             | Plate             | 24              | Manufacture of basic metals                              | BE      |
|             | Plate_pres        | 24              | Manufacture of basic metals                              | BE      |
|             | Protection cap    | 22              | Manufacture of rubber and plastic products               | BE      |
|             | Slide bar         | 22              | Manufacture of rubber and plastic products               | BE      |
|             | Tie rod           | 24              | Manufacture of basic metals                              | BE      |
|             | Cap               | 22              | Manufacture of rubber and plastic products               | BE      |
|             | Washers           | 24              | Manufacture of basic metals                              | BE      |
|             | Bolts             | 24              | Manufacture of basic metals                              | BE      |
|             | Pin               | 24              | Manufacture of basic metals                              | BE      |
|             | Nuts              | 24              | Manufacture of basic metals                              | BE      |
|             | Thread insert     | 24              | Manufacture of basic metals                              | BE      |
|             | Electricity       | 35              | Electricity, gas, steam and air conditioning supply      | BE      |
|             | Transport by rail | 49              | Land transport and transport via pipelines               | BE      |
|             | Transport by road | 49              | Land transport and transport via pipelines               | BE      |

**Table S8.** Assignment inventory components to industrial sectors in the recycling stage.

| Component         |                                               | Activity sector |                                                                                                                                               |         |
|-------------------|-----------------------------------------------|-----------------|-----------------------------------------------------------------------------------------------------------------------------------------------|---------|
|                   | Name                                          | Code            | Name                                                                                                                                          | Country |
| Inputs            | Reagent                                       | 20              | Manufacture of chemicals and chemical products                                                                                                | BE      |
|                   | Industrial water                              | 36              | Water collection, treatment and supply                                                                                                        | BE      |
|                   | H <sub>2</sub> SO <sub>4</sub> (92%)          | 20              | Manufacture of chemicals and chemical products                                                                                                | BE      |
|                   | Lime                                          | 20              | Manufacture of chemicals and chemical products                                                                                                | BE      |
| Outputs           | Lithium salt (LiCO <sub>3</sub> )             | 20              | Manufacture of chemicals and chemical products                                                                                                | BE      |
|                   | Steel                                         | 24              | Manufacture of basic metals                                                                                                                   | BE      |
|                   | Aluminium                                     | 24              | Manufacture of basic metals                                                                                                                   | BE      |
|                   | Copper                                        | 24              | Manufacture of basic metals                                                                                                                   | BE      |
|                   | Water to sewer                                | 37-39           | Sewerage; waste collection, treatment and disposal activities; materials recovery; remediation activities and other waste management services | BE      |
|                   | Plastic                                       | 22              | Manufacture of rubber and plastic products                                                                                                    | BE      |
|                   | Residue                                       | 37-39           | Sewerage; waste collection, treatment and disposal activities; materials recovery; remediation activities and other waste management services | BE      |
|                   | Gypsum (CaSO <sub>4</sub> , H <sub>2</sub> O) | 37-39           | Sewerage; waste collection, treatment and disposal activities; materials recovery; remediation activities and other waste management services | BE      |
| Electricity       |                                               | 35              | Electricity, gas, steam and air conditioning supply                                                                                           | BE      |
| Transport by road |                                               | 49              | Land transport and transport via pipelines                                                                                                    | BE      |

**Table S9.** Top 5 economic activity sectors contributing to each of the total impacts assessed. The list of codes with the corresponding economic activity sector is included in Table S1.

| Global Warming Potential [g CO <sub>2</sub> eq / km]  |         |       |        |         |       |           |          |       |        |         |       |
|-------------------------------------------------------|---------|-------|--------|---------|-------|-----------|----------|-------|--------|---------|-------|
| Manufacturing                                         |         |       | Use    |         |       | Recycling |          |       | Total  |         |       |
| Sector                                                | Impact  | %     | Sector | Impact  | %     | Sector    | Impact   | %     | Sector | Impact  | %     |
| E                                                     | 15.07   | 36.73 | E      | 30.81   | 89.48 | 27t28     | -5.66    | 31.58 | E      | 42.41   | 73.70 |
| 24                                                    | 8.37    | 20.40 | C      | 1.40    | 4.07  | C         | -3.84    | 21.43 | 24     | 6.52    | 11.34 |
| C                                                     | 5.76    | 14.03 | 23     | 0.39    | 1.14  | E         | -3.47    | 19.39 | C      | 3.32    | 5.77  |
| 27t28                                                 | 5.17    | 12.61 | 27t28  | 0.34    | 0.99  | 24        | -1.98    | 11.05 | 23     | 1.45    | 2.52  |
| 60                                                    | 1.58    | 3.86  | 60     | 0.33    | 0.96  | 60        | -0.60    | 3.33  | 60     | 1.32    | 2.30  |
| Terrestrial Acidification [g SO <sub>2</sub> eq / km] |         |       |        |         |       |           |          |       |        |         |       |
| Manufacturing                                         |         |       | Use    |         |       | Recycling |          |       | Total  |         |       |
| Sector                                                | Impact  | %     | Sector | Impact  | %     | Sector    | Impact   | %     | Sector | Impact  | %     |
| E                                                     | 0.037   | 32.93 | E      | 0.044   | 80.47 | E         | -0.017   | 30.82 | E      | 0.064   | 57.12 |
| 24                                                    | 0.024   | 21.05 | AtB    | 0.003   | 5.11  | 27t28     | -0.013   | 24.66 | 24     | 0.020   | 17.55 |
| AtB                                                   | 0.011   | 10.17 | 23     | 0.002   | 2.92  | AtB       | -0.006   | 11.39 | AtB    | 0.008   | 7.12  |
| 27t28                                                 | 0.011   | 9.69  | C      | 0.001   | 2.62  | 24        | -0.004   | 7.75  | C      | 0.006   | 5.27  |
| C                                                     | 0.009   | 7.70  | 60     | 0.001   | 2.31  | C         | -0.004   | 7.60  | 60     | 0.005   | 4.14  |
| Photochemical Oxidation Formation [g NMVOC / km]      |         |       |        |         |       |           |          |       |        |         |       |
| Manufacturing                                         |         |       | Use    |         |       | Recycling |          |       | Total  |         |       |
| Sector                                                | Impact  | %     | Sector | Impact  | %     | Sector    | Impact   | %     | Sector | Impact  | %     |
| 23                                                    | 0.054   | 27.11 | E      | 0.035   | 55.78 | 27t28     | -0.024   | 27.77 | E      | 0.059   | 33.48 |
| 24                                                    | 0.046   | 22.94 | 23     | 0.014   | 21.65 | 23        | -0.018   | 20.75 | 23     | 0.050   | 28.24 |
| E                                                     | 0.030   | 15.14 | C      | 0.003   | 4.87  | 24        | -0.012   | 13.85 | 24     | 0.035   | 19.83 |
| C                                                     | 0.018   | 9.03  | 60     | 0.003   | 4.36  | C         | -0.008   | 9.29  | C      | 0.013   | 7.41  |
| 27t28                                                 | 0.015   | 7.39  | 27t28  | 0.001   | 2.22  | E         | -0.006   | 7.49  | 60     | 0.010   | 5.90  |
| Particulate Matter [g PM <sub>10</sub> eq / km]       |         |       |        |         |       |           |          |       |        |         |       |
| Manufacturing                                         |         |       | Use    |         |       | Recycling |          |       | Total  |         |       |
| Sector                                                | Impact  | %     | Sector | Impact  | %     | Sector    | Impact   | %     | Sector | Impact  | %     |
| E                                                     | 9.8E-03 | 33.61 | E      | 1.2E-02 | 81.18 | E         | -3.9E-03 | 28.70 | E      | 1.8E-02 | 58.90 |
| 24                                                    | 5.6E-03 | 19.23 | AtB    | 5.0E-04 | 3.39  | 27t28     | -3.6E-03 | 26.06 | 24     | 4.7E-03 | 15.40 |
| 27t28                                                 | 2.7E-03 | 9.36  | 60     | 4.9E-04 | 3.35  | AtB       | -1.1E-03 | 7.97  | 60     | 1.8E-03 | 6.01  |
| C                                                     | 2.4E-03 | 8.24  | 23     | 3.8E-04 | 2.57  | 24        | -1.1E-03 | 7.82  | C      | 1.8E-03 | 5.95  |
| 60                                                    | 2.3E-03 | 7.71  | C      | 3.5E-04 | 2.37  | C         | -9.6E-04 | 7.00  | AtB    | 1.4E-03 | 4.62  |
| Economic Impact [€/km]                                |         |       |        |         |       |           |          |       |        |         |       |
| Manufacturing                                         |         |       | Use    |         |       | Recycling |          |       | Total  |         |       |
| Sector                                                | Impact  | %     | Sector | Impact  | %     | Sector    | Impact   | %     | Sector | Impact  | %     |
| 24                                                    | 1.9E-02 | 23.82 | E      | 1.6E-02 | 57.58 | 27t28     | -1.9E-02 | 44.67 | E      | 2.1E-02 | 30.34 |
| 27t28                                                 | 1.4E-02 | 17.48 | 71t74  | 2.8E-03 | 9.81  | 24        | -5.3E-03 | 12.51 | 24     | 1.4E-02 | 21.28 |
| C                                                     | 9.0E-03 | 10.99 | F      | 1.1E-03 | 3.99  | 71t74     | -2.9E-03 | 6.72  | C      | 7.6E-03 | 11.19 |
| 71t74                                                 | 5.4E-03 | 6.59  | C      | 9.4E-04 | 3.28  | C         | -2.3E-03 | 5.48  | 71t74  | 5.3E-03 | 7.87  |
| E                                                     | 5.0E-03 | 6.09  | 27t28  | 8.4E-04 | 2.92  | 51        | -2.0E-03 | 4.64  | 25     | 2.8E-03 | 4.13  |



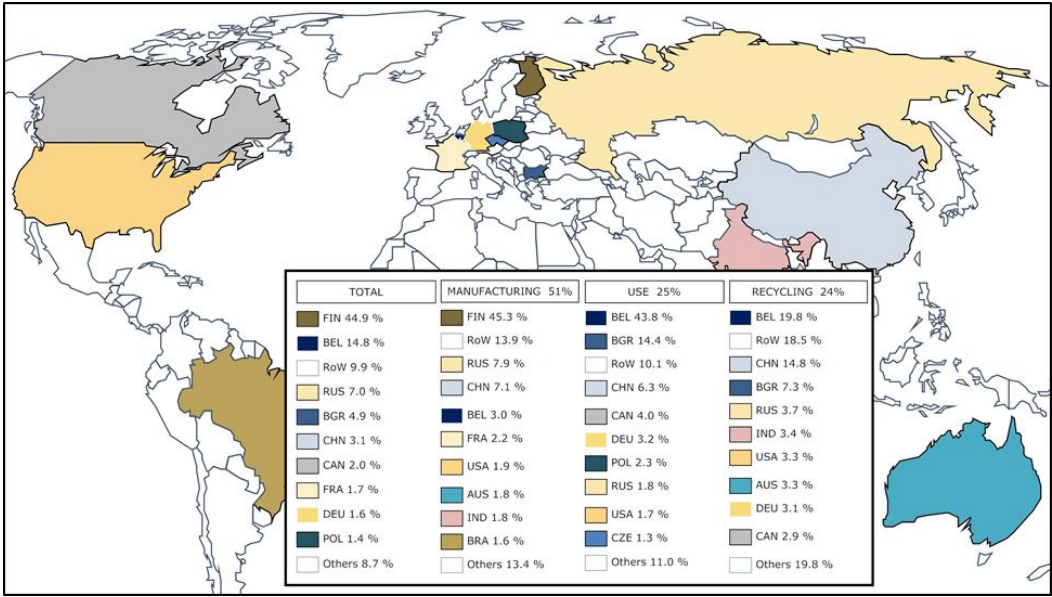

**Figure S1.** Geographical resolution and country contribution to Terrestrial Acidification of the life cycle stages of the ESS.

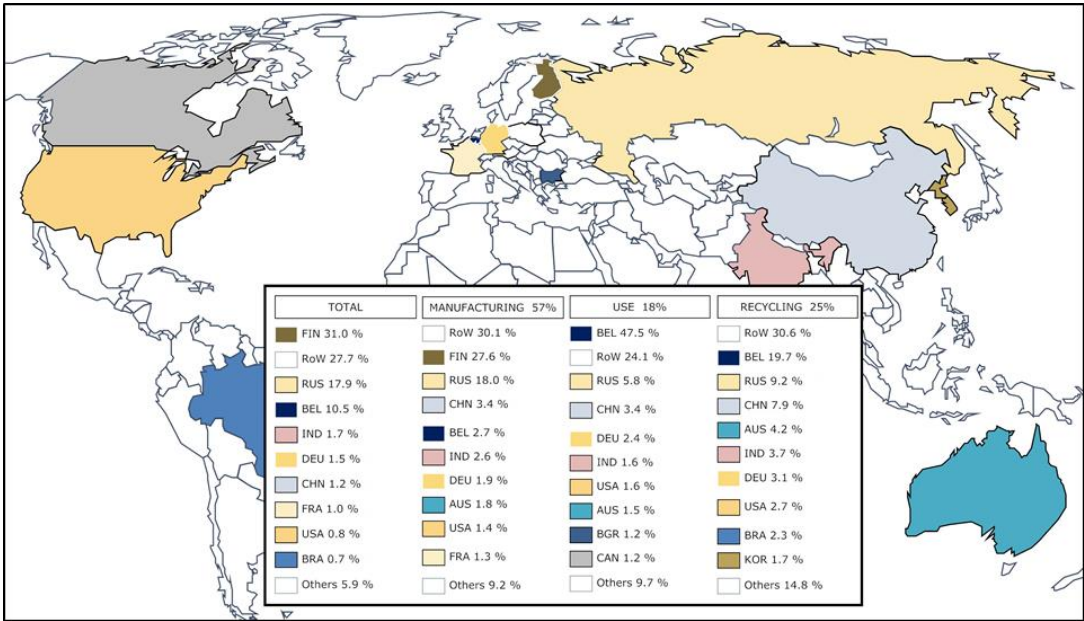

**Figure S2.** Geographical resolution and country contribution to Photochemical Oxidation Formation of the life cycle stages of the ESS.

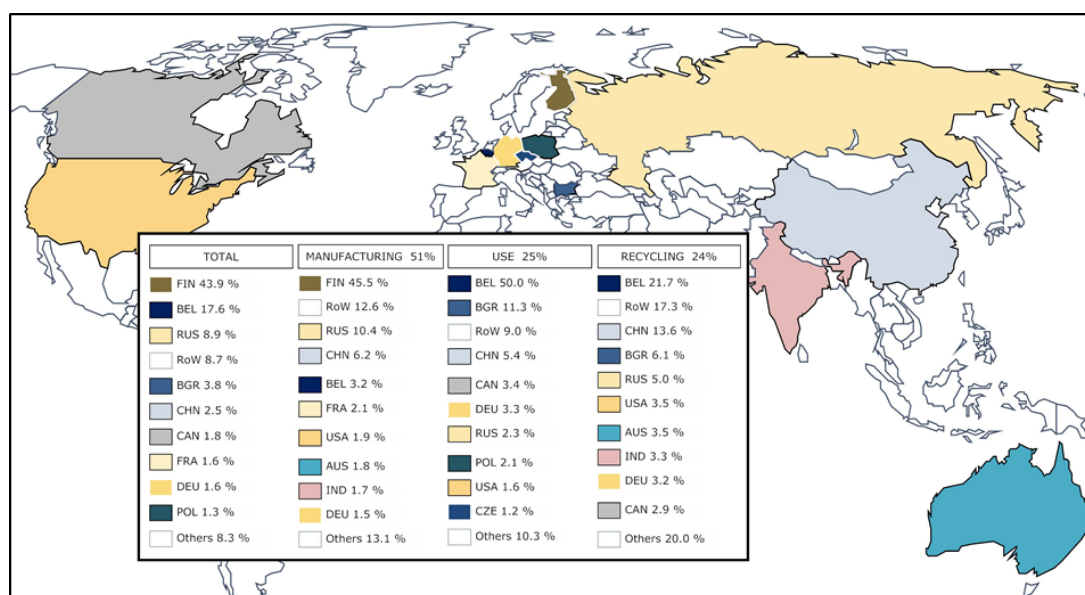

**Figure S3.** Geographical resolution and country contribution to Particulate Matter Formation of the life cycle stages of the ESS.

## References

1. Beutel, J. *Eurostat Methodologies and Working Papers: Eurostat Manual of Supply, Use and Input-Output Tables*; European Communities: Brussel, Belgium, 2008; pp. 2008–2590. Available online: <http://ec.europa.eu/eurostat/ramon/statmanuals/files/KS-RA-07-013-EN.pdf> (accessed on 16 March 2016).
2. Miller, R.E.; Blair, P.D. *Input-Output Analysis: Foundations and Extensions*; Cambridge University Press: Cambridge, UK, 2009.
3. Hendrickson, C.; Horvath, A.; Joshi, S.; Lave, L. Economic input-output models for environmental life-cycle assessment. *Environ. Sci. Technol.* **1998**, *7*, 184–191.
